# Supplementary material for: Cell-type-specific CAG repeat expansions and toxicity of mutant Huntingtin in human striatum and cerebellum
Source: PubMed Central journal article supplement (PMC10937393; doi:10.1038/s41588-024-01653-6), 2024-01-30
Supplement: 41588_2024_1653_MOESM6_ESM.pdf [file 41588_2024_1653_MOESM6_ESM.pdf]

# Source Data for Figure 5

## Source data for anti-MSH2 western blot quantification

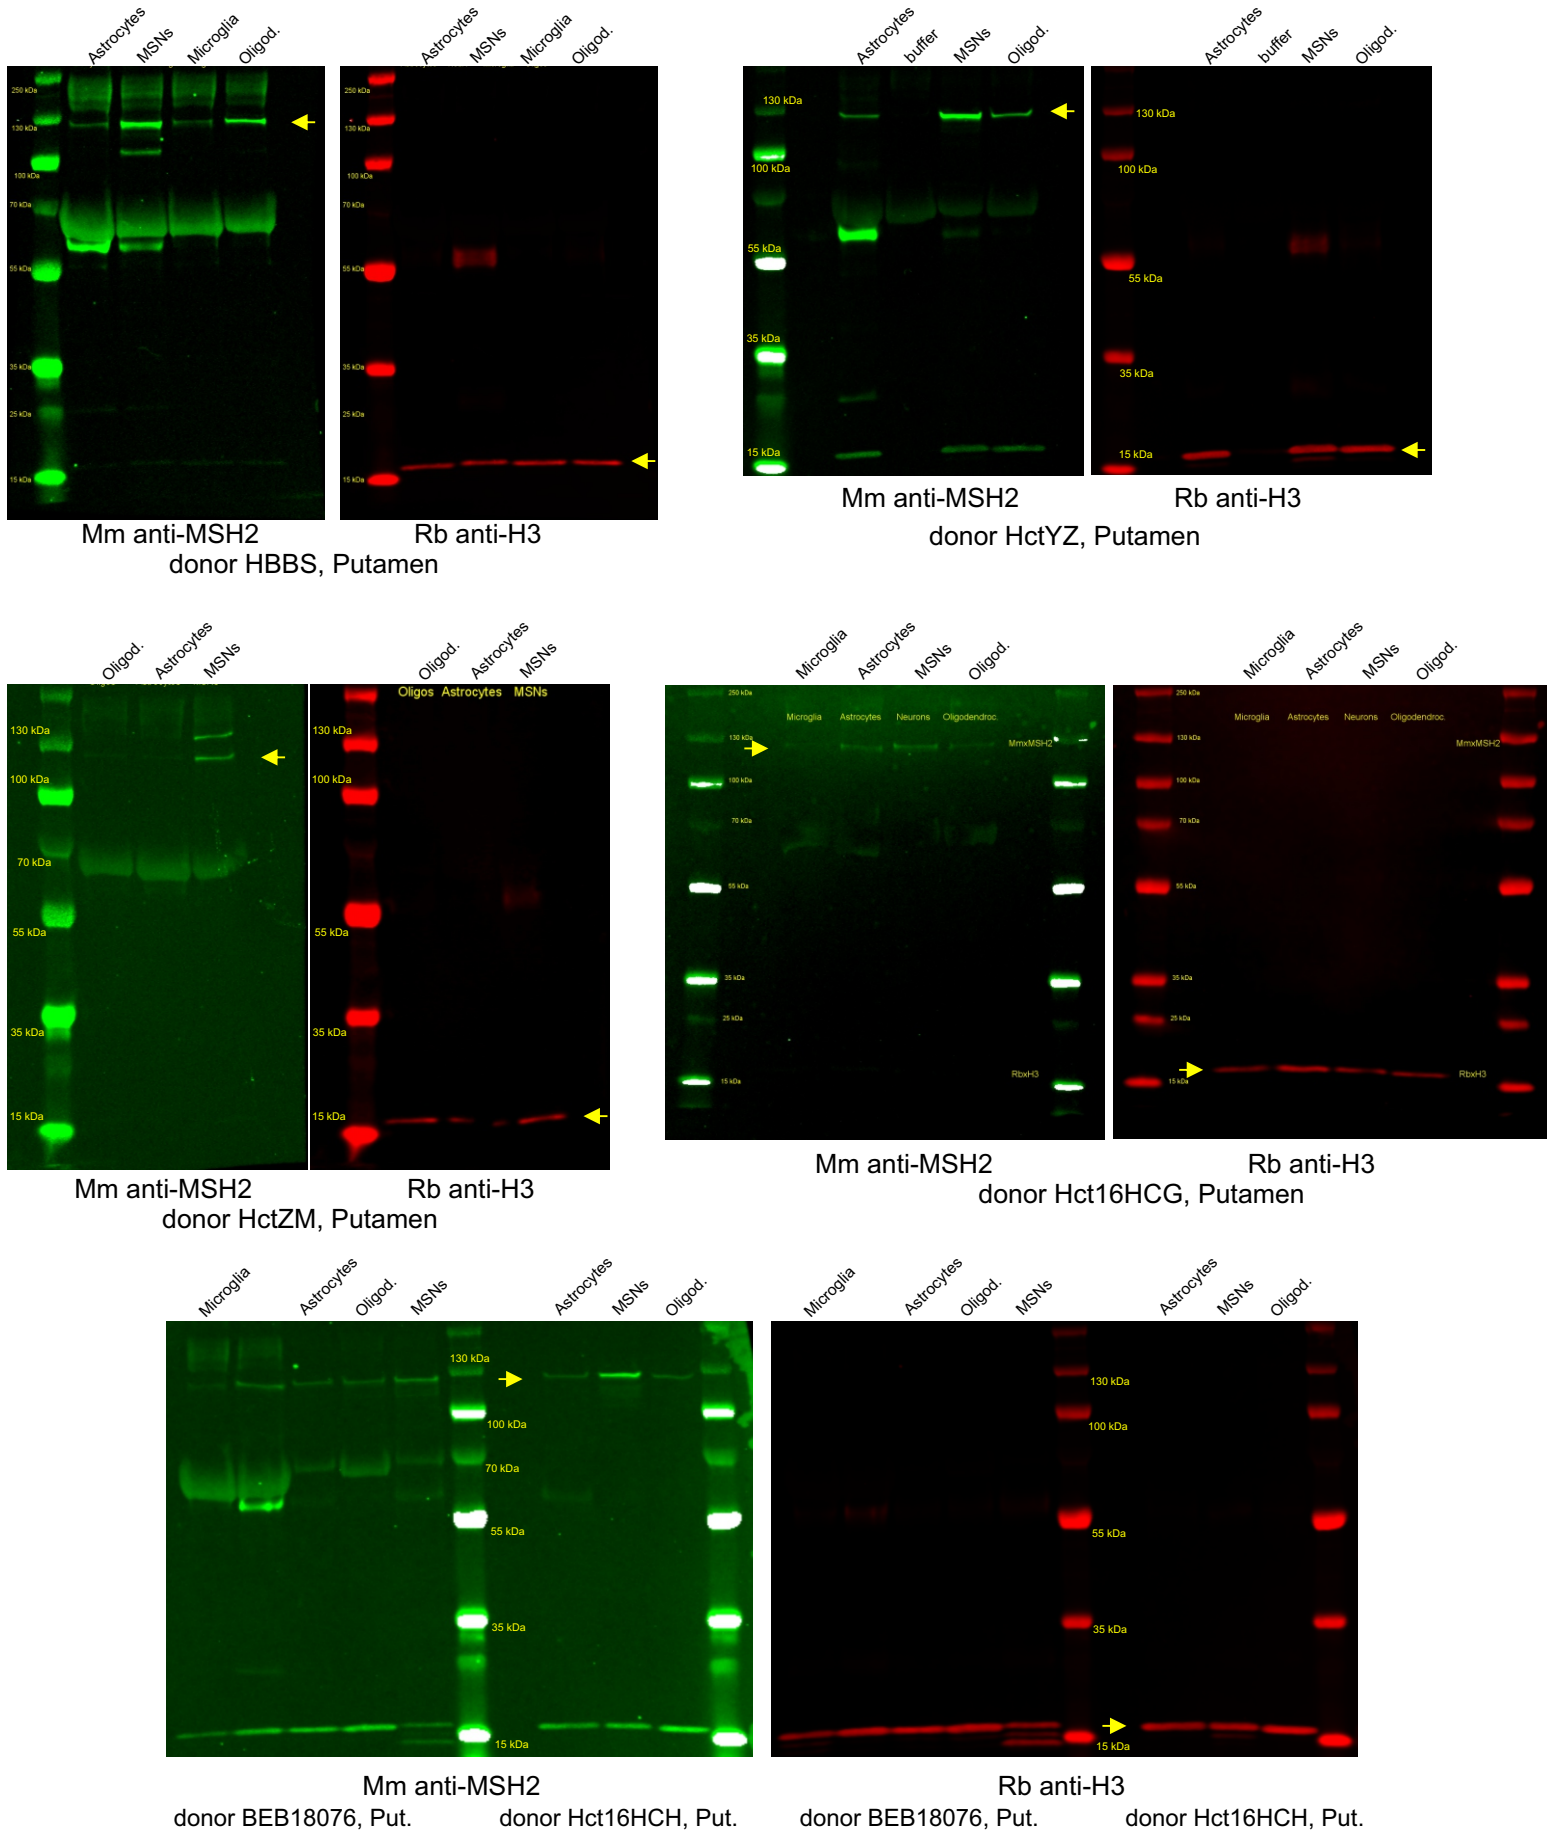

**Source Data for Figure 5.** Arrows point to MSH2 and H3 signal on blots probed with anti-MSH2 and anti-H3, respectively. Additional bands likely represent BSA present in the buffer (below 70 kDa) and heavy chain of antibodies used for staining nuclei for FANS (around 60 kDa).

# Source Data for Figure 5

## Source data for anti-MSH3 western blot quantification

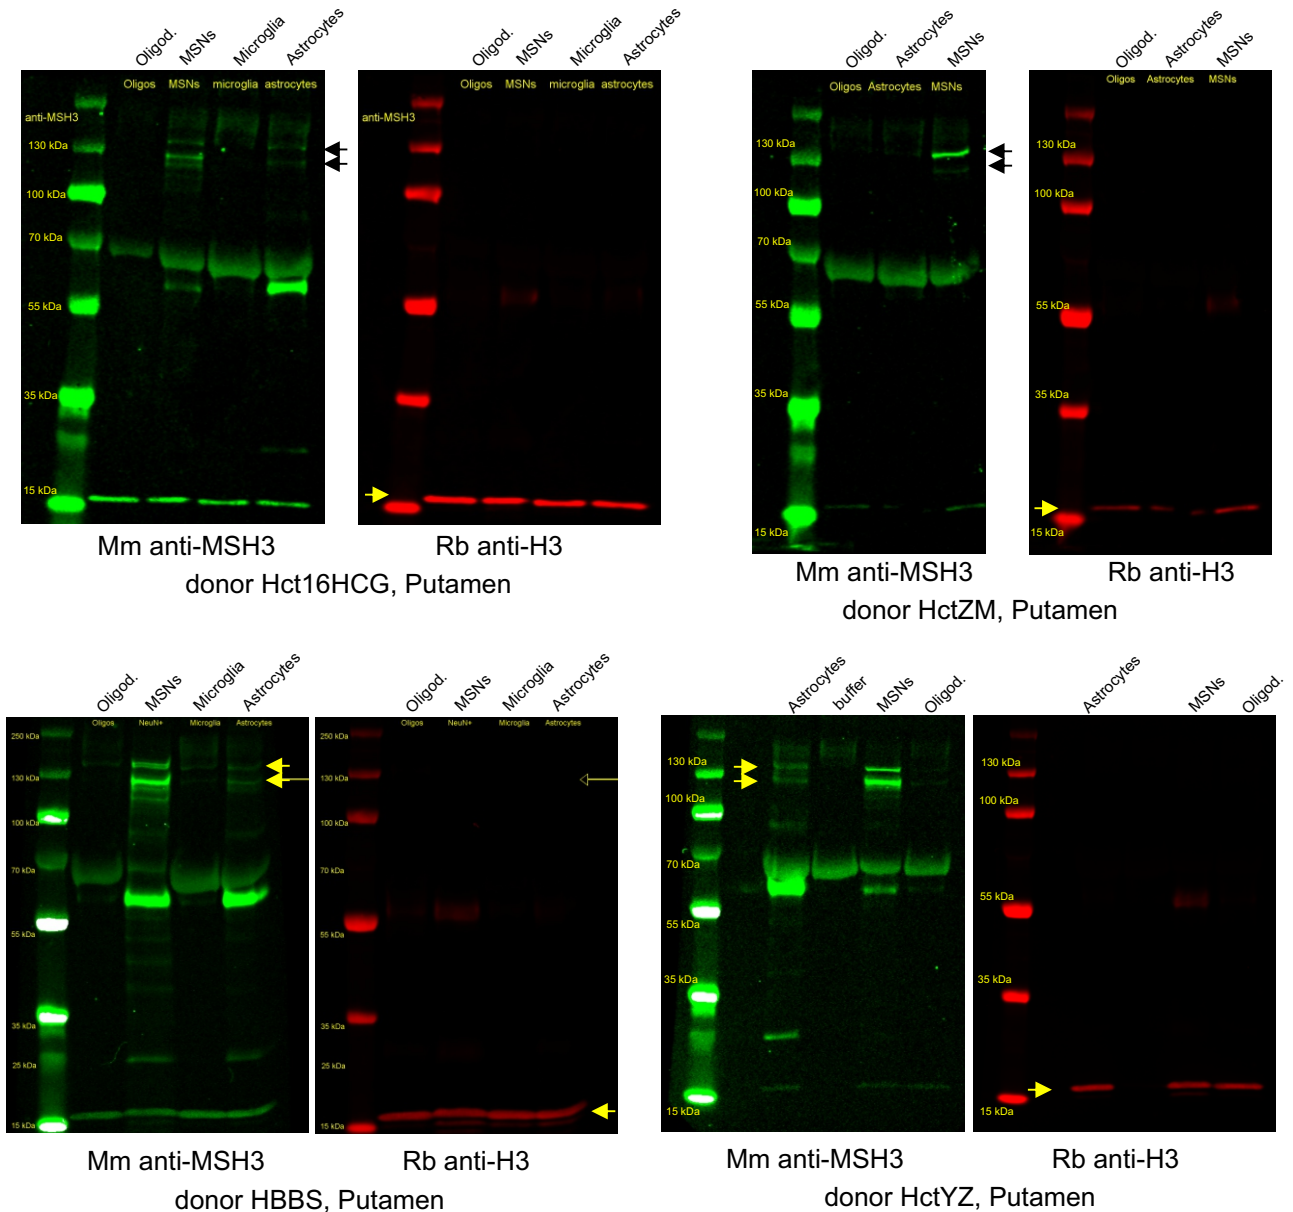

**Source Data for Figure 5.** Arrows point to MSH3 and H3 signal on blots probed with anti-MSH3 and anti-H3, respectively. Additional bands likely represent BSA present in the buffer (below 70 kDa) and heavy chain of antibodies used for staining nuclei for FANS (around 60 kDa).
